# Supplementary material for: Synthesis and characterization of neutral iron(ii) and ruthenium(ii) complexes with the isocyanotriphenylborate ligand
Source: Royal Society of Chemistry journal article supplement (doi:10.1039/b914262b), 2009-01-01
Supplement: b914262b.pdf [file b914262b.pdf]

*Electronic Supplementary Information*

**Syntheses and Characterization of Neutral Iron(II) and Ruthenium(II) Complexes with Isocyano-triphenylborate Ligand**

**Yan Zhou, Hong-Ping Xiao, Ling-Chen Kang, Jing-Lin Zuo<sup>\*</sup>, Cheng-Hui Li<sup>\*</sup> and Xiao-Zeng You<sup>a</sup>**

*State Key Laboratory of Coordination Chemistry, School of Chemistry and Chemical Engineering, Nanjing National Laboratory of Microstructures, Nanjing University, Nanjing 210093, P. R. China*

---

\* To whom correspondence should be addressed. Email: zuojl@nju.edu.cn. Fax: +86-25-83314502.  
Nanjing University.

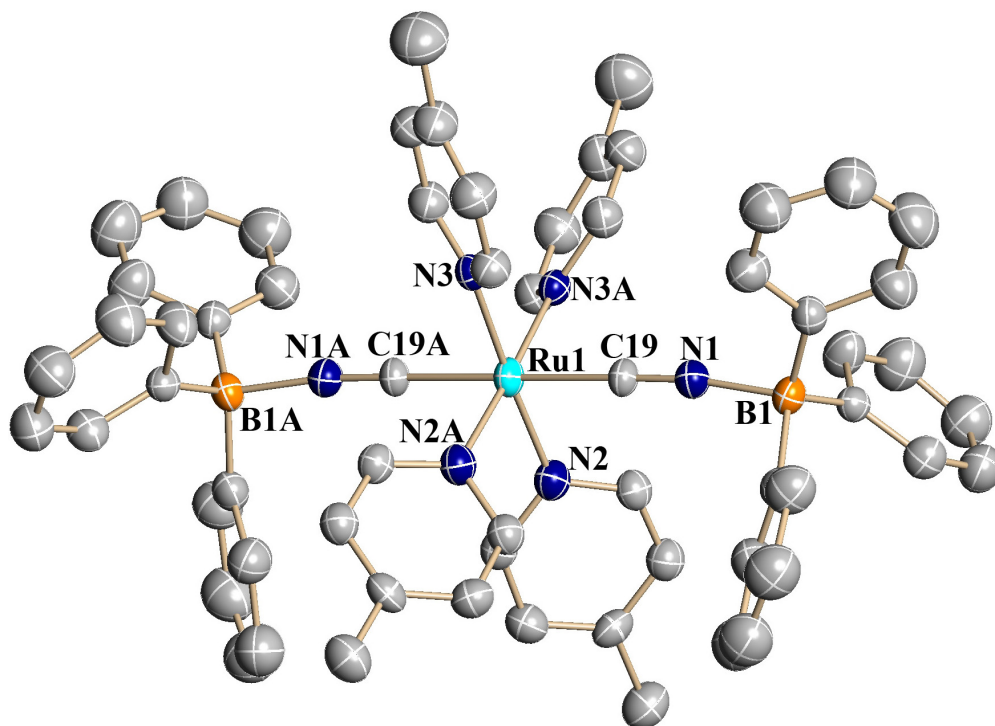

**Fig. S1** Perspective view of complex **2** with the atomic numbering scheme. Hydrogen atoms are omitted for clarity.

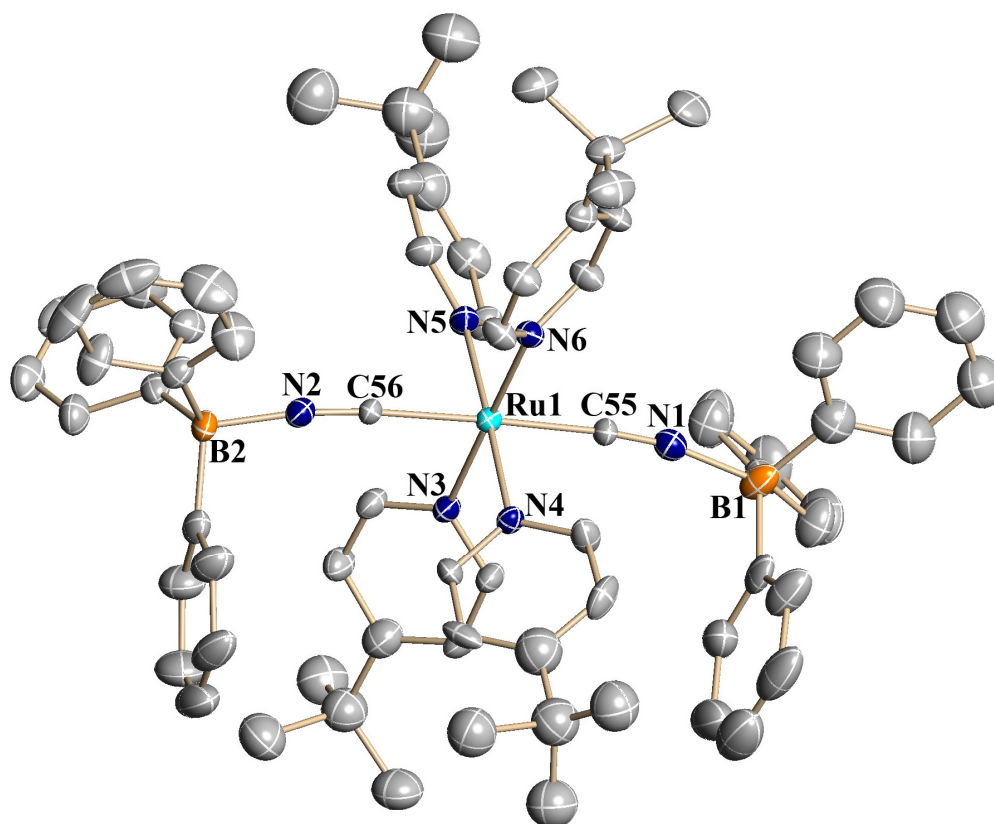

**Fig. S2** Perspective view of complex **3** with the atomic numbering scheme. Hydrogen atoms are omitted for clarity.

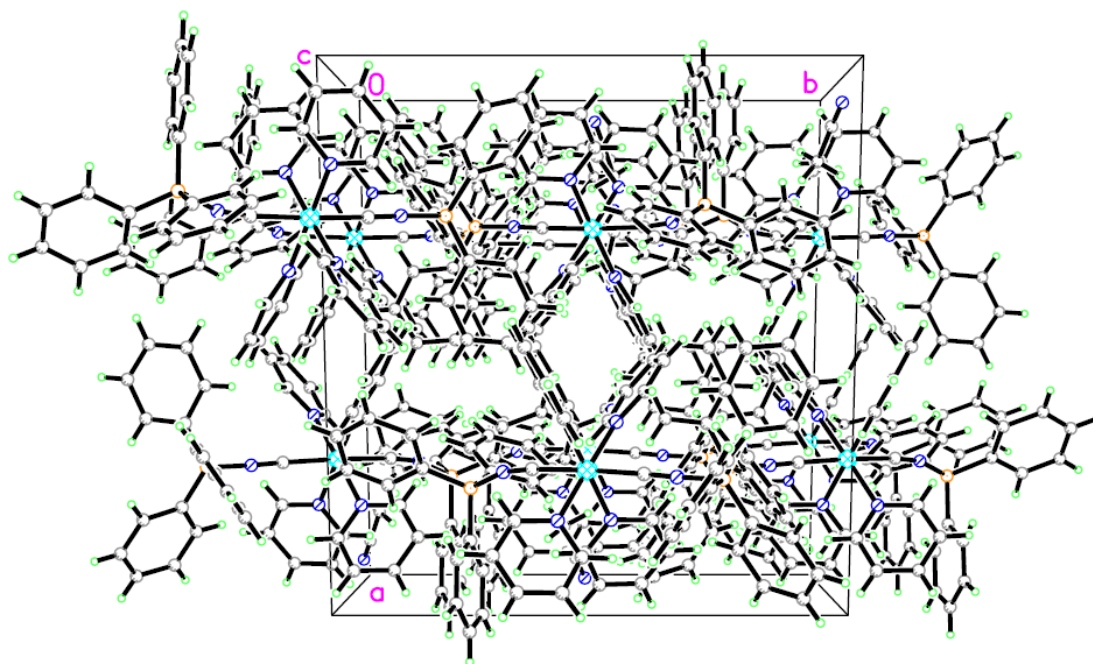

**Fig. S3.** The packing diagram of complex **1** looking along the *c* axis.

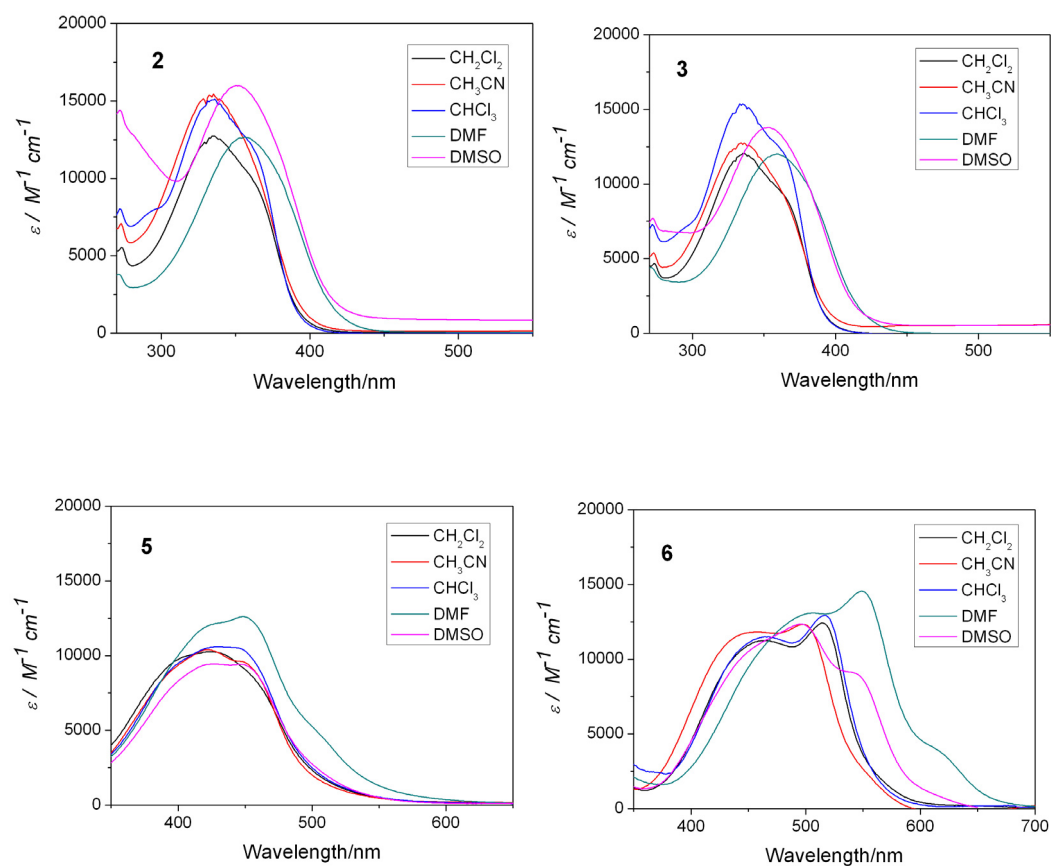

**Fig. S4.** Absorption spectra of **2**, **3**, **5** and **6** in various solvents ( $5 \times 10^{-5}$  mol/L).
